# Supplementary material for: ML2Motif—Reliable extraction of discriminative sequence motifs from learning machines
Source: PubMed Central journal article supplement (PMC5367830; doi:10.1371/journal.pone.0174392), 2017-03-27
Supplement: pone.0174392.s001.pdf [file pone.0174392.s001.pdf]

## S1 Appendix

### S1.1 Further details for extracting motifs by mimicking POIMs

**Definition S.1** (SubPPMs). A PPM of length  $k$  is modeled as a set of  $D$  SubPPMs,  $D := k - \tilde{k} + 1$  with length  $\tilde{k} \leq k$ , where SubPPMs are defined by

$$\tilde{m}_d(m_k, \tilde{k}) := (\tilde{r}, \tilde{\mu}, \sigma), \forall d = 0, \dots, D - 1.$$

Here,  $\tilde{\mu} := \mu + d$  and  $\tilde{r} := r[d, d + \tilde{k} - 1]$ , where  $r[d, d + \tilde{k} - 1]$  is the  $d$ -th until the  $(d + \tilde{k} - 1)$ -th column of the PPMs PWM  $r$ .

**Notation S.1.** Let  $\tilde{k} \in \mathbb{N}$  be the value defining the SubPPMs of Def. S.1 and  $\mathcal{K} \subset \mathbb{N}, |\mathcal{K}| < \infty$  defining the set of motif lengths, so that  $\forall k' \in \mathbb{N}$  with  $k' < \tilde{k} : k' \notin \mathcal{K}$  and  $T \in \mathbb{N}_0^{\max(\mathcal{K})}$  be the vector defining the number of motifs of any length in  $\mathcal{K}$ .

Given Def. S.1 and Notation S.1, the objective function is as follows:

$$f(\eta) = \frac{1}{2} \sum_{k \in \mathcal{K}} \sum_{y \in \Sigma^{\tilde{k}}} \sum_{j=1}^L \left( \sum_{t=1}^{T_k} \lambda_{k,t} \sum_{d=0}^{D-1} R_{y,j}(\tilde{m}_d(m_{k,t}, \tilde{k})) - Q_{\tilde{k},y,j} \right)^2, \quad (\text{S.1})$$

where  $\lambda$  indicates the motif relevance and  $\eta = (m_{k,t}, \lambda_{k,t}, \tilde{k})_{t=1, \dots, T_k, k \in \mathcal{K}}$ . The associated constrained non-linear optimization problem is thus as follows:

$$\begin{aligned} \min_{(m_{k,t}, \lambda_{k,t})_{t=1, \dots, T_k, k \in \mathcal{K}}} & f(\eta) & (\text{S.2}) \\ \text{s.t.} & \epsilon \leq \sigma_{k,t} \leq k, & t = 1, \dots, T_k, k \in \mathcal{K} \\ & 1 \leq \mu_{k,t} \leq L - k + 1, & t = 1, \dots, T_k, k \in \mathcal{K} \\ & 0 \leq \lambda_{k,t} \leq \infty, & t = 1, \dots, T_k, k \in \mathcal{K} \\ & \epsilon \leq r_{k,t,o,s} \leq 1, & t = 1, \dots, T_k, k \in \mathcal{K} \\ & o = 1, \dots, |\Sigma|, s = 1, \dots, k, \sum_{o=1}^{|\Sigma|} r_{k,t,o,s} = 1. \end{aligned}$$

### S1.2 Extension of Theorem ?? and ?? to Multiple Motifs

**Theorem S.1.** Given Notation S.1, suppose that the objective function  $f$  of the following optimization problem

$$\begin{aligned} \min_r & f((m_{k,t})_{t=1, \dots, T_k, k \in \mathcal{K}}) = \frac{1}{2} \sum_{k \in \mathcal{K}} \sum_{y \in \Sigma^{\tilde{k}}} \sum_{j=1}^{L-\tilde{k}+1} \left( \sum_{t=1}^{T_k} (R_{y,j}(m_{k,t}) - S_{\tilde{k},y,j} + c) \right)^2 \\ \text{s.t.} & 0 \leq r_{k,t,o,s} \leq 1 \quad t = 1, \dots, T_k, k \in \mathcal{K}, o = 1, \dots, 4, s = 1, \dots, k, \\ & \sum_o r_{k,t,o,s} = 1 \quad t = 1, \dots, T_k, k \in \mathcal{K}, s = 1, \dots, k, \end{aligned}$$

is convex and let  $r_c^*$  be the optimal solution, then  $\forall c' \in \mathbb{R} \ r_{c'}^* = r_c^*$ .

*Proof.* Let  $r_c^*$  be the optimal solution of the objective function  $f$  (S.3) with the inequality constraints  $h_{k,t,o,s,1} = -r_{k,t,o,s}$  and  $h_{k,t,o,s,2} = r_{k,t,o,s} - 1$ ,  $k \in \mathcal{K}, t = 1, \dots, T_k, o = 1, \dots, 4, s = 1, \dots, k, i = 1, 2$  and the equality constraints  $g_{k,t,s} = \sum_o r_{o,s} - 1$ ,  $k \in \mathcal{K}, t = 1, \dots, T_k, s = 1, \dots, k$ , and let  $\eta$  and  $\xi$  be the Lagrangian multipliers, then the Lagrangian function is as follows

$$\mathcal{L}(r, \eta, \xi) = f(r_c^*; \mu) + \sum_{k \in \mathcal{K}} \sum_{t=1}^{T_k} \sum_{o=1}^4 \sum_{s=1}^k \sum_{i=1}^2 \eta_{k,t,o,s,i} h_{k,t,o,s,i} + \sum_{k \in \mathcal{K}} \sum_{t=1}^{T_k} \sum_{s=1}^k \xi_{k,t,s} g_{k,t,s}.$$

The Karush-Kuhn-Tucker(KKT) conditions are satisfied for  $r_c^*$ : The primal feasibility conditions ( $g_{k,t,s} = 0$ ,  $\mathcal{K}, t = 1, \dots, T_k, s = 1, \dots, k$  and  $h_{k,t,o,s,i} \leq 0$ ,  $\mathcal{K}, t = 1, \dots, T_k, o = 1, \dots, 4, s = 1, \dots, k, i = 1, 2$ ) are trivially fulfilled, since  $r_c^*$  is a stochastic matrix. Together with the dual feasibility conditions ( $\eta \geq 0$ ) the complementary slackness condition ( $\eta_{k,t,o,s,i} h_{k,t,o,s,i} = 0$ ,  $\mathcal{K}, t = 1, \dots, T_k, o = 1, \dots, 4, s = 1, \dots, k, i = 1, 2$ ) are trivially fulfilled as well, which leaves us to show that the stationarity condition

$$\nabla f(r_c^*; \mu) + \sum_{k \in \mathcal{K}} \sum_{t=1}^{T_k} \sum_{i=1}^2 \sum_o \sum_{s=1}^k \eta_{k,t,o,s,1} \nabla h_{k,t,o,s,i} + \sum_{k \in \mathcal{K}} \sum_{t=1}^{T_k} \sum_s \xi_{k,t,s} \nabla g_{k,t,s} = 0$$

is satisfied. Therefore we insert the derivations and reorganize for the Lagrange multipliers  $\xi$ , which leads to

$$\begin{aligned} \xi_{k,t,s} = & - \sum_{k \in \mathcal{K}} \sum_y \sum_j 1_{\{i \in \mathcal{U}(\mu)\}} \left( \sum_{t=1}^{T_k} \prod_{l=1}^{\tilde{k}} r_{c,k,t,y_l,j+l}^* \prod_{\substack{l=1 \\ l \neq t}}^{\tilde{k}} r_{c,k,t,y_l,j+l}^* \right. \\ & \left. - (S_{\tilde{k},y,j+\mu} - c) \prod_{\substack{l=1 \\ l \neq t}}^{\tilde{k}} r_{c,k,t,y_l,j+l}^* \right) + \sum_{k \in \mathcal{K}} \sum_{t=1}^{T_k} \sum_{i=1}^2 \eta_{k,t,o,s,i}. \end{aligned}$$

With  $\xi \in \mathbb{R}$  it holds, that for any  $c' \in \mathbb{R}$   $r_{c'}^* = r_c^*$ . The fact that  $f$  is convex,  $h$  is convex and  $g$  is affine denotes the KKT conditions as sufficient and concludes the proof.  $\square$

**Theorem S.2** (Convexity for multiple motifs). *Given Notation 1, let  $D$  be a convex set,  $m_k \in D$  a probabilistic motif,  $S$  a gPOIM, such that  $S_{\tilde{k},y,j} \in \mathbb{R}$  for  $y \in \Sigma^{\tilde{k}}$  and  $j = 1, \dots, L - \tilde{k} + 1$ ,  $\mu \in [1, L - k + 1]$ ,  $c \in \mathbb{R}$  and  $S_{\lfloor}$  the element wise minimum of  $S$  then, if  $c \geq \mathbb{1}_{\{S_{\lfloor} < 0\}} S_{\lfloor} + \mathbb{1}_{\{S_{\lfloor} < T_k\}} T_k$  it holds that*

$$f((m_{k,t})_{t=1, \dots, T_k, k \in \mathcal{K}}) = \frac{1}{2} \sum_{k \in \mathcal{K}} \sum_{y \in \Sigma^{\tilde{k}}} \sum_{j=1}^{L-\tilde{k}+1} \left( \sum_{t=1}^{T_k} R_{y,j}(m_{k,t}) - (S_{\tilde{k},y,j} + c) \right)^2$$

is convex.

*Proof.* We have to proof the following inequality to show convexity of  $f(m_k)$

$$\begin{aligned} \left\| \sum_{t=1}^{T_k} R(\Phi r_{k,t} + (1 - \Phi) s_{k,t}; \mu) - (S + c') \right\|_2^2 & \leq \Phi \left\| \sum_{t=1}^{T_k} R(r_{k,t}; \mu) - (S + c') \right\|_2^2 \\ & + (1 - \Phi) \left\| \sum_{t=1}^{T_k} R(s_{k,t}; \mu) - (S + c') \right\|_2^2 \end{aligned}$$

which is, for the case  $j \notin \mathbb{1}_{\{i \in \mathcal{U}(\mu)\}}$ , trivially fulfilled for  $c' \in \mathbb{R}$ . This, due to the fact, that a sum of convex functions is convex, leaves us with showing the following inequality

$$\begin{aligned} \left( \sum_{t=1}^{T_k} \Phi a_t + (1 - \Phi) b_t - (S_{\tilde{k},y,j} + c') \right)^2 & \leq \Phi \left( \sum_{t=1}^{T_k} a_t - (S_{\tilde{k},y,j} + c') \right)^2 \\ & + (1 - \Phi) \left( \sum_{t=1}^{T_k} b_t - (S_{\tilde{k},y,j} + c') \right)^2, \end{aligned} \quad (\text{S.3})$$

where we replaced the PWM products  $\prod_{l=j}^{k+j} r_{k,t,y_l,l}$  and  $\prod_{l=j}^{k+j} s_{k,t,y_l,l}$  by  $a_t$  and  $b_t$  for more transparency. After resolving and transforming Eq. (S.3) shortens to

$$\Phi^2 \sum_{t=1}^{T_k} a_t^2 + 2\Phi \sum_{t=1}^{T_k} a_t b_t - 2\Phi^2 \sum_{t=1}^{T_k} a_t b_t \leq \Phi \sum_{t=1}^{T_k} a_t^2 + 2\Phi(S_{\bar{k},y,j} + c')^2. \quad (\text{S.4})$$

Since  $-2\Phi^2 \sum_{t=1}^{T_k} a_t b_t \leq 0$  and  $\Phi^2 \sum_{t=1}^{T_k} a_t^2 \leq \Phi \sum_{t=1}^{T_k} a_t^2$ , Eq. (S.4) reduces to  $\sum_{t=1}^{T_k} a_t b_t \leq (S_{\bar{k},y,j} + c')^2$ . The fact that the maximum of  $\sum_{t=1}^{T_k} a_t b_t$  is  $T_k$ , concludes the proof for  $c \geq c'$  with  $c' = \mathbb{1}_{\{\min(S) < 0\}} S_{\lfloor} + \mathbb{1}_{\{S_{\lfloor} < T_k\}} T_k$ .  $\square$
